# Supplementary material
Source: PubMed Central journal article supplement (PMC3433606)
Supplement: mmc1.pdf [file mmc1.pdf]

SUPPORTING MATERIAL:

Protein logic: a statistical mechanical study of function at the  
single-protein level

Wiet de Ronde<sup>1</sup>  
FOM Institute AMOLF

Pieter Rein ten Wolde  
FOM Institute AMOLF

Andrew Mugler  
FOM Institute AMOLF

July 25, 2012

<sup>1</sup>FOM Institute AMOLF, Science Park 104, 1098 XG, Amsterdam

## SI. 1 Optimization details

### Optimization parameters

In Table SI-1 we provide bounds for our optimization parameters  $K_i^j, \omega_0$  and  $\omega_{ii'}$ . In this section we provide experimental support for the chosen bounds.

- $\omega_0$   
Two experimental studies report on explicit values of  $\omega_0$ . In the quorum sensing bacterium *V. Harveyi* an  $\omega_0$  value is reported of  $e^{-\Delta\epsilon/k_B T} = e^{3.2} \approx 24$  (1). Next, a conformational spread model for the motor proteins in *E. coli* reported for  $\omega_0 = e^{-E_A/k_B T} = e^{-0.66} = 0.51$  (2). Moreover, two modeling studies have also suggested values for  $\omega_0$ . In (3) a value of  $\omega_0 = e^{-E_A/k_B T} = 0.36$ , while in (4) a large range for  $\omega_0$  is suggested  $\omega_0 \sim [e^{-10} - e^{10}]$ .
- $\omega_{ii'}$   
For *E. coli* different experimental observations are reported, both for the motor proteins and the receptors. The receptor coupling energy has been reported to be around  $0 k_B T$ , leading to  $\omega_{ii'} = 1$  (5, 6). For the motor protein, a value for  $\omega_{ii'} = e^{E_{ii'}/k_B T} = 62$  has been reported (2). In a modeling study of the protein N-WASP  $\omega_{ii'} \sim 300$  has been used (7). In the EGFR receptor for monomers  $K_D \sim 10^0$  [nM], while for dimers  $K_D \sim 10^{-2}$  [nM], suggesting a positive coupling between two monomers ( $\omega_{ii'} > 1$ ) (8). In the same modeling studies as cited above, estimates are  $E_j = \ln \omega_{ii'} = 0-4 k_B T$  (3) and a large range  $\omega_{ii'} \sim [e^{-10} - e^{15}]$  (4).
- $K_i^j$   
In *E. coli* dissociation constants for different ligands and activation states for the Tar and Tsr receptors have been measured which vary between  $[10^{-2} - 10^6]$  [mM] (5, 6). Experimental work on the receptors of the quorum sensing machinery in *V. Harveyi* where single amino-acids are replaced have resulted in dissociation constant varying between  $[10^0 - 10^5]$  [nM] (1). For EGFR different  $K_D$ 's are reported for different dimer pairs, ranging from 10 [pM] to 500 [nM] (8, 9). Synthetic proteins are constructed with varying dissociation constants for different ligands, where the  $K_D$  ranges from  $[1 - 1000]$  [ $\mu$ M] (10) or  $[10^{-1} - 10^5]$  [ $\mu$ M] (11). A mathematical model based upon a three-state receptor with multiple ligands used  $K_D$  values from  $[10^{-9} - 10^{-5}]$  [ $\mu$ M] for each ligand and state of the system (12).

### Multiple receptors

In the case where  $M$  different receptors (e.g.  $Q_{UV}, Q_{WV}, Q_{UW}$ ) are combined to act in different combinations as unique logic gates, the optimization algorithm follows a specific order in the optimization. A straightforward extension of the model for a single receptor is the optimization of three (or four) gates simultaneously, and taking as fitness  $\mathcal{F}$  the summed fitness of every gate  $F_m$ :

$$\mathcal{F} = \sum_{m=1}^M F_m. \quad (\text{SI-1})$$

However, this optimization is not capable of optimizing all the gates independently. Instead, the algorithm optimizes either one (or two) gates, but then cannot optimize the third gate. To optimize the third gate, the already optimized gates decrease (temporarily) in fitness. This decrease is larger

| Model input            | Range                          |
|------------------------|--------------------------------|
| $[S_1], [S_2]$         | $[10^{-2} - 10^2] \mu\text{M}$ |
| Model parameter        | Bounds                         |
| $K_{i,k}^j$            | $[10^{-3} - 10^4] \mu\text{M}$ |
| $\omega_0$             | $[10^{-3} - 10^3]$             |
| $\omega_{ii'}$         | $[10^{-2} - 10^2]$             |
| Optimization parameter | Value                          |
| $\Delta$               | 0.3                            |
| $N$                    | 4                              |
| $R$                    | 50000                          |
| Steps                  | 1000                           |

Table SI-1: Overview of parameters. During optimization, model parameters are initialized and constrained within the indicated bounds.

than the increase in fitness for the third gate and the algorithm finds suboptimal peaks in this rugged fitness landscape.

Instead of optimizing all gates simultaneously, we optimize gates in order. For the homodimer construction ( $Q_{\text{WW}}, Q_{\text{UW}}, Q_{\text{WV}}$ ), we first optimize  $Q_{\text{WW}}$ , then  $Q_{\text{UW}}$ , where we only change the parameters of  $U$ , and then  $Q_{\text{WV}}$ , only changing  $V$ . The achieved results greatly outperform the results where we optimize all three gates simultaneously.

For the heterodimer construction ( $Q_{\text{UW}}, Q_{\text{WV}}, Q_{\text{UV}}$ ), we again start by optimizing gate  $Q_{\text{UW}}$ , then the two gates  $Q_{\text{UW}}$  and  $Q_{\text{WV}}$  simultaneously, and finally  $Q_{\text{UW}}, Q_{\text{WV}},$  and  $Q_{\text{UV}}$ . Again this procedure gives much better results than simultaneous optimization of all three gates.

For the construction with ( $Q_{\text{WW}}, Q_{\text{UW}}, Q_{\text{UV}}$ ), we start by optimizing gate  $Q_{\text{WW}}$ , then the two gates  $Q_{\text{WW}}$  and  $Q_{\text{UW}}$  simultaneously, and finally  $Q_{\text{WW}}, Q_{\text{UW}},$  and  $Q_{\text{UV}}$ .

## SI. 2 Formal proof that receptor $Q_{\text{UW}}$ can perform an XOR gate

The probability to be active  $p^A([S_1], [S_2])$  in an XOR gate is a nonmonotonic function of  $[S_1]$  and  $[S_2]$  simultaneously. More specifically, for constant  $[S_2] = [S_2^c]$ ,  $p^A([S_1], [S_2^c])$  is either monotonically increasing or decreasing, depending on the value  $[S_2^c]$ : for small  $[S_2^c]$ ,  $p^A$  is monotonically increasing, while for large  $[S_2^c]$ ,  $p^A$  is monotonically decreasing.

A positive derivative  $\partial p^A / \partial [S_2]$  reflects a monotonically increasing function, while a negative derivative reflects a monotonically decreasing function. Therefore, in an XOR gate, the derivative of the probability with respect to  $[S_2]$  at constant  $[S_1^c]$  should change sign as function of  $[S_1^c]$ . Again due to symmetry, the derivative of the probability with respect to  $[S_1]$  at constant  $[S_2^c]$  should change sign as function of  $[S_2^c]$ . We will prove that the XOR gate is possible for the  $Q_{\text{UW}}$  receptor even with  $\omega_{11} = \omega_{21} = 1$ . Recalling Eq. 1, the derivative can be written  $\partial p^A / \partial [S_2] = f / (Z^A + Z^I)^2$ , where the numerator

$$f([S_1^c], [S_2]) = \frac{\partial Z^A}{\partial [S_2]} Z^I - Z^A \frac{\partial Z^I}{\partial [S_2]} \quad (\text{SI-2})$$

alone determines the sign. We therefore must show that  $f$  changes sign as function of  $[S_1^c]$ . Specifically, the XOR gate requires

$$f > 0 \text{ for } [S_1^c] < [S_1^c]^*, \quad (\text{SI-3})$$

$$f < 0 \text{ for } [S_1^c] > [S_1^c]^*, \quad (\text{SI-4})$$

for some  $[S_1^c]^*$  and all  $[S_2]$ .

The partition functions  $Z^A$  and  $Z^I$  for the  $Q_{UW}$  receptor are given by Eqs. 9-10 in the main text. Performing the derivatives in Eq. SI-2 reveals that  $f$  is a third order polynomial in  $[S_1^c]$  in which all dependence on  $[S_2]$  drops out. Only one root is potentially positive:

$$[S_1^c]^* = \frac{K_{1,W}^I K_{1,W}^A (K_2^I - K_2^A)}{K_{1,W}^I K_2^A - K_{1,W}^A K_2^I}. \quad (\text{SI-5})$$

To satisfy Eqs. SI-3-SI-4, we require that the zeroth order term (the intercept) is positive and that the leading order term is negative; enforcing these conditions yields

$$K_2^I - K_2^A > 0, \quad (\text{SI-6})$$

$$K_{1,W}^I K_2^A - K_{1,W}^A K_2^I > 0, \quad (\text{SI-7})$$

which are in fact the precise conditions that maintain positivity of the root (Eq. SI-5). Parameters that satisfy these conditions enable the sign of  $\partial p^A / \partial [S_2]$  to depend on constant  $[S_1^c]$ , which is one of the two conditions necessary to perform the XOR gate. Notably, Eq. SI-6 directly shows that the binding of ligand 2 to the  $W$  monomer in  $Q_{UW}$  in the active state is less likely than binding in the inactive state.

The second requirement is that the sign of  $\partial p^A / \partial [S_1]$  depends on constant  $[S_2^c]$ . Specifically, as in Eqs. SI-3-SI-4, the XOR gate requires that the numerator  $g([S_1], [S_2^c])$  of the derivative satisfies

$$g > 0 \text{ for } [S_2^c] < [S_2^c]^*, \quad (\text{SI-8})$$

$$g < 0 \text{ for } [S_2^c] > [S_2^c]^*. \quad (\text{SI-9})$$

for some  $[S_2^c]^*$  and all  $[S_1]$ . Performing the derivative reveals that  $g$  is a second order polynomial whose coefficients depend on  $[S_1]$ . To satisfy Eqs. SI-8-SI-9, we again require that the intercept is positive and that the leading order term is negative; enforcing these conditions yields

$$h([S_1], K_{1,U}^I, K_{1,U}^A, K_{1,W}^I, K_{1,W}^A) > 0, \quad (\text{SI-10})$$

$$K_{1,U}^I - K_{1,U}^A < 0, \quad (\text{SI-11})$$

where the function  $h$  results straightforwardly from the derivative but is unwieldy, such that we do not reproduce it here. The roots of the polynomial  $[S_2^c]^*$  are similarly unwieldy, but noting positivity requirements ( $[S_2^c]^* > 0$ ,  $K_{1,W}^I > 0$ ,  $K_{1,U}^I > 0$ ,  $K_2^I > 0$ ), parameter regimes can be derived that satisfy both Eqs. SI-6-SI-7 and Eqs. SI-10-SI-11 simultaneously. As an example we

present one possible regime here:

$$\frac{K_{1,W}^A}{K_{1,W}^I} < \frac{K_2^A}{K_2^I} < 1, \quad (\text{SI-12})$$

$$0 < \frac{K_{1,W}^A}{K_{1,W}^I} \leq \frac{K_{1,U}^I}{K_{1,U}^I + K_{1,W}^I}, \quad (\text{SI-13})$$

$$K_{1,W}^A + K_{1,U}^A > K_{1,U}^I + K_{1,W}^I. \quad (\text{SI-14})$$

Eq. SI-12 states that the  $W$  monomer is activated by  $[S_1]$  and  $[S_2]$ , and that activation by  $[S_1]$  is stronger than activation by  $[S_2]$ . Note that for small concentrations of either  $[S_1]$  or  $[S_2]$ ,  $W$  is inactive. The two more interesting constraints are in Eq. SI-13 and Eq. SI-14. Eq. SI-14 states that  $[S_1]$  bound to monomer  $U$  deactivates the receptor ( $K_{1,U}^A > K_{1,U}^I$ ), since, from Eq. SI-12, we have seen that  $K_{1,W}^A < K_{1,W}^I$ . More importantly the deactivation of  $U$  by binding  $[S_1]$  is stronger than the activation of  $W$  by  $[S_1]$ , and following Eq. SI-12, it is thus also stronger than activation of  $W$  by  $[S_2]$ . This is precisely the interference interaction as described in the main text. The last constraint, Eq. SI-13, provides the required binding strength of  $[S_1]$  to  $U$  and  $W$  to satisfy all constraints. In the main text we argue that  $W$  should preferably bind  $[S_2]$ , such that in the presence of both ligand  $[S_2]$  binds to  $W$  and  $[S_1]$  binds to  $U$  with as result that  $Q_{UW}$  is inactive.

Here we have shown that the  $Q_{UW}$  receptor is capable of the nonmonotonic derivatives required by the XOR gate. This capability is necessary but not sufficient to perform the gate, as an ideal logic gate requires that the output be maximally high and low at the appropriate input values. Our numerical results, however, indeed confirm that the  $Q_{UW}$  receptor can perform the XOR gate.

### SI. 3 Parameter sensitivity

In this section we discuss the sensitivity to parameter variation of the results at the six parameter sets  $\varphi_k$  shown in Fig. 3. Robustness against parameter fluctuations generally is considered an important quality of biochemical systems, due to stochastic nature of intra- and extracellular processes. If the observed logic gates only function within a very narrow parameter regime, this could lead to unreliable functioning.

Parameters are varied according to

$$\varphi_{\text{new}}^z = \varphi_{\text{old}}^z (1 + n^z) \quad (\text{SI-15})$$

where  $n^z$  is the  $z$ th component of a uniformly distributed random vector  $\mathbf{n}$  with norm  $|\mathbf{n}| = \eta$ . Under this implementation,  $\eta$  sets the average (root mean square) factor by which each parameter changes via  $\langle \delta\varphi^z / \varphi^z \rangle = \eta / \sqrt{Z}$ , where  $Z$  is the number of parameters. We sample  $10^6$  different vectors  $\mathbf{n}$ .

Sensitivity is measured by computing the fraction of new parameter sets for which, for each individual gate  $m$ , the relative change in fitness is less than a factor  $\lambda$ :

$$\frac{|F_m^{\text{new}} - F_m^{\text{old}}|}{F_m^{\text{old}}} < \lambda \quad \forall m. \quad (\text{SI-16})$$

Figure SI-1 reveals that for all  $\varphi_k$ , most random perturbations in which each parameter changes by an average of  $\langle \delta\varphi^z / \varphi^z \rangle \sim 20\%$  change the fitness of none of the three logic gates by more than  $\lambda = 10\%$ .

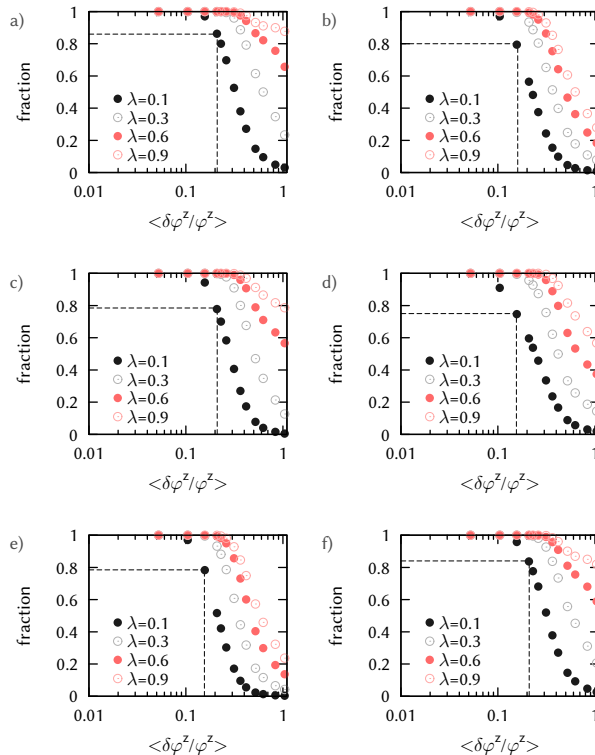

Figure SI-1: Robustness to parameter variation for the six parameter sets at which dimers can form three unique logic gates (Fig. 3): (a)  $\varphi_1$ , (b)  $\varphi_2$ , (c)  $\varphi_3$ , (d)  $\varphi_4$ , (e)  $\varphi_5$ , and (f)  $\varphi_6$ . An increase in  $\langle \delta\varphi^z / \varphi^z \rangle$  reflects a larger range of parameter fluctuations and an increase in  $\lambda$  reflects a loosening of the robustness constraint. The dashed black lines indicate that a significant fraction of random perturbations in which each parameter changes by an average of  $\langle \delta\varphi^z / \varphi^z \rangle \sim 20\%$  change the fitness of none of the three logic gates by more than  $\lambda = 10\%$ .

## SI. 4 Further intuition behind functions accessible by recombination

In the main text, we provide the intuition behind how the first two groups of logic gates in Fig. 3 are performed by the corresponding receptors. Here, we provide similar intuition for the last four groups. Then, we argue why the six groups observed in Fig. 3 (and their counterparts obtained upon ligand exchange) are the *only* groups of three unique logic gates that one expects to observe under this model.

### Parameter sets not discussed in the main text

Parameter set  $\varphi_3$  (Fig. 3, third row) is similar to set  $\varphi_2$  (see discussion of  $\varphi_2$  in main text). In particular, receptor  $Q_{UW}$  performs the XOR gate in the same way. The difference between  $\varphi_3$  and  $\varphi_2$  is that ligand-bound  $V$  promotes activation instead of suppressing activation. Since ligand-bound  $W$  also promotes activation, this feature allows receptor  $Q_{WV}$  to perform the OR gate. However,

ligand-bound  $U$  suppresses activation more strongly than ligand-bound  $V$  promotes activation. This feature allows receptor  $Q_{UV}$  to perform the  $\text{ANDN}_{S_1}$  gate, since only in the presence of ligand 2 and not 1 will activation be promoted via  $V$  and not suppressed via  $U$ .

Parameter set  $\varphi_4$  (Fig. 3, fourth row) corresponds to a case where ligand-bound  $U$  and ligand-bound  $V$  both promote activation. This feature is sufficient for receptor  $Q_{UV}$  to perform the OR gate. Furthermore, ligand 2 binds more strongly to  $V$  than to  $W$ , and ligand-bound  $W$  suppresses activation more strongly than ligand-bound  $V$  promotes activation. These features allow receptor  $Q_{WV}$  to perform the  $\text{ANDN}_{S_1}$  gate, since only in the presence of ligand 2 and not 1 will activation be promoted via  $V$  and not suppressed via  $W$ . Finally, (i) ligand 1 binds more strongly to  $W$  than to  $U$ , (ii) ligand 2 binds more strongly to  $W$  than ligand 1 does, and (iii) ligand-bound  $U$  promotes activation more strongly than ligand-bound  $W$  suppresses activation. These three features allow receptor  $Q_{UW}$  to perform the AND gate: when ligand 1 is present alone, feature (i) results in suppression via  $W$ ; when ligand 2 is present alone, it only binds to  $W$ , resulting in suppression; and when both ligands are present, features (ii) and (iii) cause ligand 2 to bind to  $W$ , forcing ligand 1 to bind to  $U$  and thus activating the receptor.

Parameter set  $\varphi_5$  (Fig. 3, fifth row) is once again similar to set  $\varphi_2$ . In particular, receptors  $Q_{WW}$  and  $Q_{UW}$  perform the OR gate and the XOR gate in the same way, respectively. Additionally, ligand 1 suppresses activation via  $U$  more strongly than ligand 2 promotes activation via  $V$ . This feature allows receptor  $Q_{UV}$  to perform the  $\text{ANDN}_{S_1}$  gate, since only in the presence of ligand 2 and not 1 will the receptor be active.

Parameter set  $\varphi_6$  (Fig. 3, sixth row) is similar to set  $\varphi_1$  (see discussion of  $\varphi_1$  in main text). In particular, receptors  $Q_{WW}$  and  $Q_{UW}$  perform the AND gate and the OR gate in the same way, respectively. Additionally, ligand 2 suppresses activation via  $V$  more strongly than ligand 1 promotes activation via  $U$ . This feature allows receptor  $Q_{UV}$  to perform the  $\text{ANDN}_{S_2}$  gate, since only in the presence of ligand 1 and not 2 will the receptor be active.

### Figure 3 is exhaustive

Here, we argue why the groups observed in Fig. 3 (and their counterparts obtained upon ligand exchange) are the only groups of three unique logic gates that one expects to observe under this model. The overall logic is presented first, with the arguments subsequently given in subsections.

There are 4 ways to choose a group of three from the four functional dimers  $Q_{WW}$ ,  $Q_{UW}$ ,  $Q_{WV}$ , and  $Q_{UV}$  to perform the three unique logic gates:  $\{Q_{WW}, Q_{UW}, Q_{WV}\}$ ,  $\{Q_{UW}, Q_{WV}, Q_{UV}\}$ ,  $\{Q_{WW}, Q_{UW}, Q_{UV}\}$ , and  $\{Q_{WW}, Q_{WV}, Q_{UV}\}$ . The last two groups are symmetric upon ligand exchange; we therefore consider only the first three groups.

The first group is  $\{Q_{WW}, Q_{UW}, Q_{WV}\}$ . As shown in the main text, receptor  $Q_{WW}$  is capable of performing an AND gate, an OR gate, or an ANDN gate, but not an XOR gate (Fig. 2). If receptor  $Q_{WW}$  performs an AND gate, receptor  $Q_{UW}$  can perform an ANDN gate or an OR gate, but not an XOR gate (Argument 1). Receptor  $Q_{WV}$  then performs the OR gate or the ANDN gate, respectively (it also cannot perform an XOR gate by the same argument). These two possibilities are represented by parameter set  $\varphi_1$  (Fig. 3) and its counterpart upon ligand exchange. If receptor  $Q_{WW}$  performs an OR gate, receptor  $Q_{UW}$  can perform an ANDN gate or an XOR gate, but not an AND gate (Argument 2). Receptor  $Q_{WV}$  then performs the XOR gate or the ANDN gate, respectively (it also cannot perform an AND gate by the same argument). These two possibilities are represented by parameter set  $\varphi_2$  (Fig. 3) and its counterpart upon ligand exchange. If receptor  $Q_{WW}$  performs an ANDN gate, three

unique gates cannot be performed (Argument 3). Therefore, this group is exhaustively represented by  $\varphi_1$  and  $\varphi_2$ .

The second group is  $\{Q_{UW}, Q_{WV}, Q_{UV}\}$ . As shown in the main text, receptor  $Q_{UV}$  is capable of performing an ANDN gate, an OR gate, or an AND gate, but not an XOR gate (Fig. 2). If receptor  $Q_{UV}$  performs an ANDN gate, receptor  $Q_{UW}$  can perform an XOR gate or an OR gate, but not an AND gate (Argument 4). Receptor  $Q_{WV}$  then performs the OR gate or the XOR gate, respectively (it also cannot perform an AND gate by the same argument). These two possibilities are represented by parameter set  $\varphi_3$  (Fig. 3) and its counterpart upon ligand exchange. If receptor  $Q_{UV}$  performs an OR gate, receptor  $Q_{UW}$  can perform an AND gate or an ANDN gate, but not an XOR gate (Argument 5). Receptor  $Q_{WV}$  then performs the ANDN gate or the AND gate, respectively (it also cannot perform an XOR gate by the same argument). These two possibilities are represented by parameter set  $\varphi_4$  (Fig. 3) and its counterpart upon ligand exchange. If receptor  $Q_{UV}$  performs an AND gate, three unique gates cannot be performed (Argument 6). Therefore, this group is exhaustively represented by  $\varphi_3$  and  $\varphi_4$ .

The third group is  $\{Q_{WW}, Q_{UW}, Q_{UV}\}$ . We note that this group is different from the first two groups, since it does not contain the two receptors  $Q_{UW}$  and  $Q_{UV}$  which are symmetric upon ligand exchange. As shown in the main text, receptor  $Q_{WW}$  is capable of performing an AND gate, an OR gate, or an ANDN gate, but not an XOR gate (Fig. 2). If receptor  $Q_{WW}$  performs an AND gate, receptor  $Q_{UW}$  can perform an ANDN gate or an OR gate, but not an XOR gate (Argument 1). If receptor  $Q_{UW}$  performs an ANDN gate, receptor  $Q_{UV}$  cannot perform an OR gate (Argument 7); since receptor  $Q_{UV}$  also cannot perform an XOR gate (Fig. 2), three unique gates cannot be performed. Therefore, receptor  $Q_{UW}$  must perform an OR gate, leaving receptor  $Q_{UV}$  to perform an ANDN gate. This possibility is represented by parameter set  $\varphi_6$  (Fig. 3). If receptor  $Q_{WW}$  performs an OR gate, receptor  $Q_{UW}$  can perform an ANDN gate or an XOR gate, but not an AND gate (Argument 2). If receptor  $Q_{UW}$  performs as an ANDN gate, receptor  $Q_{UV}$  cannot perform an AND gate (Argument 8); since receptor  $Q_{UV}$  also cannot perform an XOR gate, three unique gates cannot be performed. Therefore, receptor  $Q_{UW}$  must perform an XOR gate, leaving receptor  $Q_{UV}$  to perform an ANDN gate. This possibility is represented by parameter set  $\varphi_6$  (Fig. 3). If receptor  $Q_{WW}$  performs as an ANDN gate, three unique gates can not be performed (Argument 9). Therefore, this group is exhaustively represented by  $\varphi_5$  and  $\varphi_6$ .

This completes the logic arguing that the groups observed in Fig. 3 are exhaustive.

### Argument 1

If receptor  $Q_{WW}$  performs an AND gate, ligand 2 alone does not promote activation when binding to monomer  $W$ . Therefore, because ligand 2 does not bind to monomer  $U$ , the receptor  $Q_{UW}$  is always inactive if ligand 2 is present alone. This behavior is inconsistent with the logic of the XOR gate.

### Argument 2

If receptor  $Q_{WW}$  performs an OR gate, ligand 2 alone promotes activation when binding to monomer  $W$ . Therefore, because ligand 2 does not bind to monomer  $U$ , the receptor  $Q_{UW}$  is always active if ligand 2 is present alone. This behavior is inconsistent with the logic of the AND gate.



**Argument 3**

If receptor  $Q_{WW}$  performs an ANDN gate, receptors  $Q_{UW}$  and  $Q_{WV}$  can each perform neither an XOR gate nor an AND gate, thereby preventing the group  $\{Q_{WW}, Q_{UW}, Q_{WV}\}$  from performing three unique gates. The reason is straightforward: if receptor  $Q_{WW}$  performs an ANDN gate, one ligand must suppress activation via  $W$  while the other ligand promotes activation via  $W$ . This feature immediately excludes the XOR gate since, as described in the main text, an XOR gate requires both ligands to promote activation via  $W$ . This feature also excludes an AND gate since, as also described in the main text, an AND gate requires either that activation via  $W$  is promoted only weakly or that both ligands suppress activation via  $W$ . In the first case, activation of receptor  $Q_{UW}$  (or  $Q_{WV}$ ) is only achieved cooperatively when both ligands are present. In the second case, activation is achieved with both ligands present via  $U$  (or  $V$ ) due to an interference effect similar to that underlying the XOR gate (see discussion of parameter set  $\varphi_4$  above).

**Argument 4**

If receptor  $Q_{UV}$  performs an ANDN $_{S_1}$  gate,  $Q_{UW}$  cannot function as an AND gate. To function as an AND gate (see Eq. 9), this requires that  $\omega_0 K_{1,U}^A K_2^A \ll K_{1,U}^I K_2^I$ , while  $\omega_0 K_{1,U}^A \gg K_{1,U}^I$  and  $\omega_0 K_2^A \gg K_2^I$ . This conditions cannot be satisfied simultaneously.

**Argument 5**

If receptor  $Q_{UV}$  performs an OR gate, ligand 1 activates the receptor via  $U$ . However, for receptor  $Q_{UW}$  to perform the XOR gate, ligand 1 must suppress activation via  $U$ , as described in the main text.

**Argument 6**

If  $Q_{UV}$  functions as an AND gate  $U$  is activated by  $S_1$  and  $V$  is activated by  $S_2$ , but both activation biases alone are insufficient to activate the receptor. This excludes the formation of a XOR gate for either the  $Q_{UW}$  or  $Q_{WV}$ . As we have discussed in the previous section, the XOR gate is obtained by the deactivation of  $U$  ( $V$ ) by ligand  $S_1$  ( $S_2$ ). However, it is possible that  $Q_{UW}$  is a OR gate, while  $Q_{WV}$  is a ANDN gate. The  $Q_{UW}$ -OR gate requires that  $W$  is activated by  $S_2$  and  $S_1$ , since monomer  $U$  is not active in the presence of  $S_1$ . The  $Q_{WV}$ -ANDN gate requires that  $W$  is strongly deactivated by  $S_1$ . These two conditions on  $W$  are mutually exclusive.

**Argument 7**

If receptors  $Q_{WW}$  and  $Q_{UW}$  perform an AND gate and an ANDN gate, respectively, the ANDN gate must be ANDN $_{S_1}$ , not ANDN $_{S_2}$ . The reason is that the AND gate requires ligand 2 to promote activation via  $W$ , while the ANDN $_{S_2}$  gate requires ligand 2 to suppress activation via  $W$ . Then, if  $Q_{UW}$  indeed performs the ANDN $_{S_1}$  gate, receptor  $Q_{UV}$  cannot perform an OR gate. The reason is that the AND and ANDN $_{S_1}$  gates require ligand 1 to suppress activation via  $U$  and not via  $W$ , while the OR gate requires ligand 1 to promote activation via  $U$ .

**Argument 8**

If receptors  $Q_{WW}$  and  $Q_{UW}$  perform an OR gate and an ANDN gate, respectively, the ANDN gate must be  $\text{ANDN}_{S_1}$ , not  $\text{ANDN}_{S_2}$ . The reason is that the OR gate requires ligand 2 to promote activation via  $W$ , while the  $\text{ANDN}_{S_2}$  gate requires ligand 2 to suppress activation via  $W$ . Then, if  $Q_{UW}$  indeed performs the  $\text{ANDN}_{S_1}$  gate, receptor  $Q_{UV}$  cannot perform an AND gate. The reason is that the OR and  $\text{ANDN}_{S_1}$  gates require ligand 1 to suppress activation via  $U$  and not via  $W$ , while the AND gate requires ligand 1 to promote activation via  $U$ .

**Argument 9**

If receptor  $Q_{WW}$  performs an ANDN gate, receptor  $Q_{UW}$  cannot perform a XOR gate gate, since this requires that both ligands activate  $W$ . If receptor  $Q_{WW}$  performs an  $\text{ANDN}_{S_1}$  gate, receptor  $Q_{UW}$  cannot perform an AND gate, since  $Q_{UW}$  is active if only ligand 2 is present. If receptor  $Q_{WW}$  performs an  $\text{ANDN}_{S_1}$  gate, receptor  $Q_{UW}$  can perform an OR gate if ligand 1 activates  $U$  more strongly than it deactivates  $W$ . However, receptor  $Q_{UV}$  is then always active if ligand 1 is present, and this is inconsistent with the logic of the AND gate. If receptor  $Q_{WW}$  performs an  $\text{ANDN}_{S_2}$  gate, receptor  $Q_{UW}$  cannot perform an AND gate, since  $Q_{UW}$  is active if only ligand 1 is present (ligand 1 activates  $U$ ) or  $Q_{UW}$  is never active (ligand 1 deactivates  $U$  more strongly than it activates  $W$ ). If receptor  $Q_{WW}$  performs an  $\text{ANDN}_{S_2}$  gate, receptor  $Q_{UW}$  can perform an OR gate, if (i) ligand 1 activates  $U$  and (ii) in the presence of small ligand 1 and an abundance of ligand 2 the receptor  $Q_{UW}$  is active. However, receptor  $Q_{UV}$  is then always active if ligand 1 is present and this is inconsistent with the logic of the AND gate.

**Supporting References**

1. Swem, L. R., D. L. Swem, N. S. Wingreen, and B. L. Bassler, 2008. Deducing receptor signaling parameters from in vivo analysis: LuxN/AI-1 quorum sensing in *Vibrio harveyi*. *Cell* 134:461–73.
2. Bai, F., R. W. Branch, D. V. Nicolau, T. Pilizota, B. C. Steel, P. K. Maini, and R. M. Berry, 2010. Supplementary Information: Conformational spread as a mechanism for cooperativity in the bacterial flagellar switch. *Science* 327:685–9.
3. Duke, T. A., N. Le Novère, and D. Bray, 2001. Conformational spread in a ring of proteins: a stochastic approach to allostery. *J. Mol. Biol.* 308:541–53.
4. Motlagh, H. N., and V. J. Hilser, 2012. Agonism/antagonism switching in allosteric ensembles. *Proc. Natl. Acad. Sci. U.S.A.* 2012.
5. Hansen, C. H., V. Sourjik, and N. S. Wingreen, 2010. A dynamic-signaling-team model for chemotaxis receptors in *Escherichia coli*. *Proc. Natl. Acad. Sci. U.S.A.* 107:17170–5.
6. Tu, Y., T. S. Shimizu, and H. C. Berg, 2008. Modeling the chemotactic response of *Escherichia coli* to time-varying stimuli. *Proc. Natl. Acad. Sci. U.S.A.* 105:14855–60.
7. Prehoda, K., and W. A. Lim, 2002. How signaling proteins integrate multiple inputs: a comparison of N-WASP and Cdk2. *Curr. Opin. Cell Biol.* 14:149–154.

8. Jorissen, R. N., F. Walker, N. Pouliot, T. P. J. Garrett, C. W. Ward, and A. W. Burgess, 2003. Epidermal growth factor receptor: mechanisms of activation and signalling. *Exp. Cell. Res.* 284:31–53.
9. Landau, M., and N. Ben-Tal, 2008. Dynamic equilibrium between multiple active and inactive conformations explains regulation and oncogenic mutations in ErbB receptors. *Biochim. Biophys. Acta* 1785:12–31.
10. Dueber, J. E., B. J. Yeh, K. Chak, and W. A. Lim, 2003. Reprogramming control of an allosteric signaling switch through modular recombination. *Science* 301:1904–8.
11. Looger, L. L., M. A. Dwyer, J. J. Smith, and H. W. Hellinga, 2003. Computational design of receptor and sensor proteins with novel functions. *Nature* 423:185–90.
12. Leff, P., C. Scaramellini, C. Law, and K. McKechnie, 1997. A three-state receptor model of agonist action. *Trends Pharmacol. Sci.* 18:355–62.
